# Supplementary material for: Relationship between the Severity of Endometriosis Symptoms (Dyspareunia, Dysmenorrhea and Chronic pelvic pain) with the Spread of the Disease on Ultrasound
Source: Research Square preprint supplement (doi:10.21203/rs.3.rs-52177/v2), 2020-10-28
Supplement: Supplementary file 1 [file ce01677f1dce2c16f5544ad9.docx]

**Supplement**

Characteristics and symptoms of women endometriosis

| **Variables** | **Amount** |
| --- | --- |
| **Age (mean ± SD) years** | 32.4± 6.2 |
| **BMI (mean ± SD ) kg/m2** | 23.4± 2.9 |
| **Education level** | |
| **Illiterate** | 1 (0.64) |
| **Elementary education** | 44(28.38%) |
| **Secondary education** | 80(51.61%) |
| **Tertiary education** | 30(19.35%) |
| **marital status** | |
| **Single** | 37(23.87%) |
| **Marred** | 114(73.54%) |
| **Other** | 4(2.58%) |
| **Parity** | |
| **nulli parity, n(%)** | 35(30.7%) in married women |
| **Primi parity, n(%)** | 32(28.0%) in married women |
| **Parity of 2 or 3 , n(%)** | 47(41.2%) in married women |
| **Preoperative symptom** | |
| **Dysmenorrhea, n(%)** | 150(97.4%) |
| **Dyspareunia, n(%)** | 75(60.48%) |
| **Dysuria, n(%)** | 5(3.2%) |
| **Dyschezia, n(%)** | 5(3.2%) |
| **Constipation** | 34(22.2%) |
